# Supplementary material for: Pressure overload induces ISG15 to facilitate adverse ventricular remodeling and promote heart failure
Source: PubMed Central journal article supplement (PMC10145941; doi:10.1172/jci161453), 2023-05-01
Supplement: jci-133-161453-s153.pdf [file jci-133-161453-s153.pdf]

**Supplemental Table 1. Phenotypic characteristics of wildtype and *Ccr2*<sup>-/-</sup> mice 8 weeks after sham or transverse aortic constriction (TAC) surgery.**

|                                    | Wildtype sham | Wildtype TAC             | <i>Ccr2</i> <sup>-/-</sup> sham | <i>Ccr2</i> <sup>-/-</sup> TAC |
|------------------------------------|---------------|--------------------------|---------------------------------|--------------------------------|
| <i>n</i>                           | 16            | 17                       | 14                              | 17                             |
| Body weight (g)                    | 28±3          | 27±3                     | 25±1 <sup>a</sup>               | 27±2                           |
|                                    |               |                          | (not recorded in 1 mouse)       |                                |
| Heart weight (mg)                  | 132±20        | 220±55 <sup>b</sup>      | 120±19 <sup>c</sup>             | 185±48 <sup>de</sup>           |
| Heart weight:tibial length (mg/mm) | 6.4±0.8       | 10.8±3.0 <sup>b</sup>    | 5.9±0.9 <sup>c</sup>            | 9.2±2.6 <sup>de</sup>          |
| Lung weight (mg)                   | 167±26        | 216±82                   | 164±35                          | 200±76                         |
| Systolic blood pressure (mmHg)     | 102±15        | 120±39                   | 110±11                          | 114±17                         |
|                                    |               | (not measured in 4 mice) |                                 |                                |

Values are mean ± S.D.. <sup>a</sup>*P* < 0.01 vs. wildtype sham, <sup>b</sup>*P* < 0.0001 vs. wildtype sham, <sup>c</sup>*P* < 0.0001 vs. wildtype TAC, <sup>d</sup>*P* < 0.01 vs. wildtype sham, <sup>e</sup>*P* < 0.001 vs. *Ccr2*<sup>-/-</sup> sham by one-way ANOVA followed by Tukey's post hoc test.

**Supplemental Table 2. Heart rate and chamber dimensions determined by M-mode echocardiography in wildtype and *Ccr2*<sup>-/-</sup> mice 8 weeks after sham or transverse aortic constriction (TAC) surgery.**

|                  | Wildtype sham | Wildtype TAC           | <i>Ccr2</i> <sup>-/-</sup> sham | <i>Ccr2</i> <sup>-/-</sup> TAC |
|------------------|---------------|------------------------|---------------------------------|--------------------------------|
| <i>n</i>         | 16            | 17                     | 14                              | 17                             |
| Heart rate (bpm) | 385±54        | 443±55                 | 415±78                          | 459±87 <sup>a</sup>            |
| LVDs (mm)        | 3.2±0.3       | 3.8±0.7 <sup>a</sup>   | 2.8±0.5 <sup>b</sup>            | 3.1±0.7 <sup>c</sup>           |
| LVDd (mm)        | 4.2±0.2       | 4.4±0.6                | 3.9±0.3 <sup>c</sup>            | 4.0±0.5 <sup>d</sup>           |
| LVESV (μl)       | 41±8          | 65±31 <sup>e</sup>     | 30±11 <sup>b</sup>              | 40±22 <sup>c</sup>             |
| LVEDV (μl)       | 80±10         | 91±29                  | 65±13 <sup>c</sup>              | 72±25                          |
| LVAWT (mm)       | 0.85±0.12     | 1.09±0.22 <sup>e</sup> | 0.88±0.16 <sup>d</sup>          | 1.14±0.22 <sup>fg</sup>        |
| LVPWT (mm)       | 0.76±0.14     | 1.03±0.25 <sup>e</sup> | 0.75±0.09 <sup>c</sup>          | 1.12±0.27 <sup>hi</sup>        |

bpm = beats per minute, LVDs = left ventricular internal diameter at systole, LVDd = left ventricular internal diameter at diastole, LVESV = left ventricular end systolic volume, LVEDV = left ventricular end diastolic volume, LVAWT = left ventricular anterior wall thickness, LVPWT = left ventricular posterior wall thickness. Values are mean ± S.D.. <sup>a</sup>*P* < 0.05 vs. wildtype sham, <sup>b</sup>*P* < 0.0001 vs. wildtype TAC, <sup>c</sup>*P* < 0.01 vs. wildtype TAC, <sup>d</sup>*P* < 0.05 vs. wildtype TAC, <sup>e</sup>*P* < 0.01 vs. wildtype sham, <sup>f</sup>*P* < 0.001 vs. wildtype sham, <sup>g</sup>*P* < 0.01 vs. *Ccr2*<sup>-/-</sup> sham, <sup>h</sup>*P* < 0.0001 vs. wildtype sham, <sup>i</sup>*P* < 0.0001 vs. *Ccr2*<sup>-/-</sup> sham by one-way ANOVA followed by Tukey's post hoc test.

**Supplemental Table 3. Invasive hemodynamic parameters in wildtype and *Ccr2*<sup>-/-</sup> mice 8 weeks after sham or transverse aortic constriction (TAC) surgery.**

|                         | Wildtype sham | Wildtype TAC        | <i>Ccr2</i> <sup>-/-</sup> sham | <i>Ccr2</i> <sup>-/-</sup> TAC |
|-------------------------|---------------|---------------------|---------------------------------|--------------------------------|
| <i>n</i>                | 10            | 13                  | 13                              | 16                             |
| Ejection fraction (%)   | 52±7          | 37±10 <sup>a</sup>  | 56±12 <sup>b</sup>              | 45±10 <sup>c</sup>             |
| P <sub>max</sub> (mmHg) | 104±13        | 154±26 <sup>d</sup> | 101±9 <sup>b</sup>              | 141±22 <sup>ef</sup>           |
| ESP (mmHg)              | 102±14        | 148±25 <sup>d</sup> | 97±9 <sup>b</sup>               | 134±22 <sup>ef</sup>           |
| EDP (mmHg)              | 16±9          | 27±10 <sup>g</sup>  | 16±5 <sup>h</sup>               | 18±8                           |
| dP/dt max<br>(mmHg/sec) | 5810±1345     | 5989±1219           | 6247±1110                       | 6295±1466                      |
| dP/dt min<br>(mmHg/sec) | -5284±1463    | -6038±1069          | -5810±1182                      | -6172±1706                     |
| Tau (ms)                | 13±4          | 13±3                | 11±3                            | 12±3                           |

P<sub>max</sub> = maximum pressure (peak systolic pressure), ESP = end systolic pressure, EDP = end diastolic pressure. Values are mean ± S.D.. <sup>a</sup>*P* < 0.01 vs. wildtype sham, <sup>b</sup>*P* < 0.0001 vs. wildtype TAC, <sup>c</sup>*P* < 0.05 vs. *Ccr2*<sup>-/-</sup> sham, <sup>d</sup>*P* < 0.0001 vs. wildtype sham, <sup>e</sup>*P* < 0.001 vs. wildtype sham, <sup>f</sup>*P* < 0.0001 vs. *Ccr2*<sup>-/-</sup> sham, <sup>g</sup>*P* < 0.05 vs. wildtype sham, <sup>h</sup>*P* < 0.05 vs. wildtype TAC by one-way ANOVA followed by Tukey's post hoc test.

**Supplemental Table 4. Top 3 significantly enriched Gene Ontology (GO) results for cardiomyocytes incubated for 24 hours in media conditioned by CCR2+ macrophages isolated from mouse hearts 4 weeks after transverse aortic constriction (TAC).**

| ID                                                     | Term                                        | Count | p_value  | FDR      |
|--------------------------------------------------------|---------------------------------------------|-------|----------|----------|
| Up differentially expressed genes Biological Process   |                                             |       |          |          |
| GO:0006952                                             | defense_response                            | 99    | 1.24e-53 | 4.55e-50 |
| GO:0002376                                             | immune_system_process                       | 121   | 1.77e-51 | 3.25e-48 |
| GO:0006955                                             | immune_response                             | 92    | 6.94e-47 | 8.48e-44 |
| Up differentially expressed genes Cellular Component   |                                             |       |          |          |
| GO:0005615                                             | extracellular_space                         | 64    | 8.50e-17 | 3.27e-14 |
| GO:0005576                                             | extracellular_region                        | 78    | 9.14e-16 | 1.76e-13 |
| GO:0005737                                             | cytoplasm                                   | 195   | 5.29e-14 | 6.79e-12 |
| Up differentially expressed genes Molecular Function   |                                             |       |          |          |
| GO:0042277                                             | peptide_binding                             | 184   | 3.79e-19 | 2.22e-16 |
| GO:0033218                                             | amide_binding                               | 184   | 6.48e-19 | 2.22e-16 |
| GO:0005515                                             | protein_binding                             | 182   | 9.54e-19 | 2.22e-16 |
| Down differentially expressed genes Biological Process |                                             |       |          |          |
| GO:0030308                                             | negative_regulation_of_cell_growth          | 3     | 5.47e-05 | 2.08e-02 |
| GO:0045926                                             | negative_regulation_of_growth               | 3     | 1.61e-04 | 3.05e-02 |
| GO:0001558                                             | regulation_of_cell_growth                   | 3     | 5.89e-04 | 5.60e-02 |
| Down differentially expressed genes Cellular Component |                                             |       |          |          |
| GO:0005741                                             | mitochondrial_outer_membrane                | 2     | 1.85e-03 | 3.33e-02 |
| GO:0019867                                             | outer_membrane                              | 2     | 2.25e-03 | 3.33e-02 |
| GO:0031968                                             | organelle_outer_membrane                    | 2     | 2.25e-03 | 3.33e-02 |
| Down differentially expressed genes Molecular Function |                                             |       |          |          |
| GO:0004842                                             | ubiquitin-protein_transferase_activity      | 2     | 1.17e-02 | 1.13e-01 |
| GO:0019787                                             | ubiquitin-like_protein_transferase_activity | 2     | 1.27e-02 | 1.13e-01 |
| GO:0016491                                             | oxidoreductase_activity                     | 2     | 4.60e-02 | 1.94e-01 |

**Supplemental Table 5. Top 5 significantly enriched KEGG pathways for cardiomyocytes incubated for 24 hours in media conditioned by CCR2+ macrophages isolated from mouse hearts 4 weeks after transverse aortic constriction (TAC).**

| <b>ID</b>                                        | <b>Term</b>                         | <b>Count</b> | <b>p_value</b> | <b>FDR</b> |
|--------------------------------------------------|-------------------------------------|--------------|----------------|------------|
| Up differentially expressed genes KEGG pathway   |                                     |              |                |            |
| mmu05168                                         | Herpes_simplex_infection            | 30           | 5.09e-17       | 1.09e-14   |
| mmu04621                                         | NOD-like_receptor_signaling_pathway | 25           | 6.38e-15       | 6.86e-13   |
| mmu05164                                         | Influenza_A                         | 20           | 2.56e-10       | 1.83e-08   |
| mmu05416                                         | Viral_myocarditis                   | 13           | 2.61e-08       | 1.40e-06   |
| mmu04612                                         | Antigen_processing_and_presentation | 13           | 3.96e-08       | 1.49e-06   |
| Down differentially expressed genes KEGG pathway |                                     |              |                |            |
| None                                             |                                     |              |                |            |

**Supplemental Table 6. Mouse cytokines and chemokines determined by multiplex assay in media conditioned by CCR2<sup>+</sup> macrophages (CD45<sup>+</sup>Ly6c<sup>hi</sup>CD11b<sup>+</sup>CD64<sup>+</sup>MHC-II<sup>hi</sup>GFP<sup>+</sup> cells) isolated from mouse hearts 4 weeks after transverse aortic constriction (TAC).**

|                                | <b>Median (range)</b> |                               | <b>Median (range)</b> |
|--------------------------------|-----------------------|-------------------------------|-----------------------|
| <b>No. of cells</b>            | 2944 (1195-3343)      | <b>LIF</b>                    | Undetectable          |
| <b>Eotaxin</b>                 | Undetectable          | <b>CCL2</b>                   | 1.07 (0-4.9)          |
| <b>G-CSF</b>                   | Undetectable          | <b>M-CSF</b>                  | Undetectable          |
| <b>GM-CSF</b>                  | Undetectable          | <b>CXCL9</b>                  | Undetectable          |
| <b>IFN-<math>\gamma</math></b> | Undetectable          | <b>CCL3</b>                   | Undetectable          |
| <b>IL-1<math>\alpha</math></b> | Undetectable          | <b>CCL4</b>                   | Undetectable          |
| <b>IL-1<math>\beta</math></b>  | 0.75 (0-2.79)         | <b>CCL5</b>                   | Undetectable          |
| <b>IL-2</b>                    | Undetectable          | <b>TNF<math>\alpha</math></b> | Undetectable          |
| <b>IL-3</b>                    | Undetectable          | <b>VEGF</b>                   | Undetectable          |
| <b>IL-4</b>                    | Undetectable          | <b>Erythropoietin</b>         | Undetectable          |
| <b>IL-5</b>                    | Undetectable          | <b>CCL21</b>                  | Undetectable          |
| <b>IL-6</b>                    | Undetectable          | <b>CX3CL1</b>                 | Undetectable          |
| <b>IL-7</b>                    | 1.35 (0.92-2.34)      | <b>IFN-<math>\beta</math></b> | <u>7.82</u> (0-12.98) |
| <b>IL-9</b>                    | 1.57 (0.56-4.13)      | <b>IL-11</b>                  | Undetectable          |
| <b>IL-10</b>                   | Undetectable          | <b>IL-16</b>                  | 1.98 (0.8-2.52)       |
| <b>IL-12 (p40)</b>             | Undetectable          | <b>IL-20</b>                  | Undetectable          |
| <b>IL-12 (p70)</b>             | Undetectable          | <b>CCL22</b>                  | Undetectable          |
| <b>IL-13</b>                   | Undetectable          | <b>CCL12</b>                  | 0.57 (0.30-1.07)      |
| <b>IL-15</b>                   | 5.61 (5.12-9.00)      | <b>CCL20</b>                  | Undetectable          |
| <b>IL-17</b>                   | Undetectable          | <b>CCL19</b>                  | Undetectable          |
| <b>IP-10</b>                   | 0.68 (0.42-0.78)      | <b>CCL17</b>                  | Undetectable          |
| <b>CXCL1</b>                   | Undetectable          | <b>TIMP-1</b>                 | Undetectable          |

Values are in pg/mL. Analytes were measured using the Eve Technologies Mouse Cytokine 44-Plex Discovery Assay. Values for LIX (CXCL5) are not presented because the assay reports that LIX results are not validated. Values are reported as undetectable if the median concentration fell below the 4 or 5 parameter logistic standard curve.

**Supplemental Table 7. Summary of the number of differentially regulated diGLY sites in left ventricles of wildtype and *Isg15*<sup>-/-</sup> mice 4 weeks after transverse aortic constriction (TAC).**

|                                                                         | Upregulated<br>(fold change >1.5) | Downregulated<br>(fold change <1/1.5) |
|-------------------------------------------------------------------------|-----------------------------------|---------------------------------------|
| Wildtype TAC vs. wildtype control                                       | 10                                | 48                                    |
| <i>Isg15</i> <sup>-/-</sup> TAC vs. <i>Isg15</i> <sup>-/-</sup> control | 74                                | 18                                    |
| <i>Isg15</i> <sup>-/-</sup> TAC vs. wildtype TAC                        | 31                                | 5                                     |

**Supplemental Table 8. Significantly upregulated diGLY sites in left ventricles of wildtype mice 4 weeks after transverse aortic constriction compared to control wildtype mice.**

| Protein name                                           | Position | GlyGly (K) probabilities      | p_value  | Difference |
|--------------------------------------------------------|----------|-------------------------------|----------|------------|
| [Protein ADP-ribosylarginine] hydrolase-like protein 1 | 335      | GLYQELEHK(1)GR                | 0.038957 | 1.319833   |
| Xin actin-binding repeat-containing protein 2          | 1054     | GISAQEIQAGNVK(1)SAR           | 0.028129 | 1.823933   |
| Titin                                                  | 12993    | TSTAK(1)LIVEELPVR             | 0.007273 | 5.088633   |
| Synaptopodin 2-like protein                            | 433      | NSPNPELLSLVQNLDEK(1)PR        | 0.003149 | 1.3043     |
| Histone-lysine N-methyltransferase 2B                  | 102      | VQLFK(0.994)IDQQQQQK(0.006)   | 0.020353 | 2.701133   |
| Atypical chemokine receptor 3                          | 362      | VSETEYSALEQNTK(1)             | 0.049858 | 0.850433   |
| Filamin-C                                              | 2590     | YGGPQHIVGSPFK(0.997)AK(0.003) | 0.002609 | 2.131467   |
| Myosin-7                                               | 1279     | AK(1)LQTENGELSR               | 0.025301 | 3.147833   |
| Myosin-7                                               | 1305     | GK(1)LTYTQQLEDLKR             | 0.017522 | 3.780733   |
| Myosin-7                                               | 34       | LEAQTRPFDLK(1)K               | 0.009401 | 3.913867   |



**Supplemental Table 9. Phenotypic characteristics of wildtype and *Isg15*<sup>-/-</sup> mice 8 weeks after sham or transverse aortic constriction (TAC).**

|                                    | Wildtype sham | Wildtype TAC                       | <i>Isg15</i> <sup>-/-</sup> sham | <i>Isg15</i> <sup>-/-</sup> TAC |
|------------------------------------|---------------|------------------------------------|----------------------------------|---------------------------------|
| <i>n</i>                           | 15            | 13                                 | 13                               | 14                              |
| Body weight (g)                    | 29±4          | 28±2                               | 28±2                             | 28±1                            |
| Heart weight (mg)                  | 114±13        | 190±40 <sup>a</sup>                | 122±16 <sup>b</sup>              | 171±38 <sup>ac</sup>            |
| Heart weight:tibial length (mg/mm) | 5.9±0.6       | 10.1±2.2 <sup>a</sup>              | 6.2±0.7 <sup>b</sup>             | 8.8±19 <sup>ac</sup>            |
| Lung weight (mg)                   | 180±20        | 227±114                            | 169±20                           | 217±101                         |
| Systolic blood pressure (mmHg)     | 100±11        | 103±17<br>(not measured in 2 mice) | 110±8                            | 113±10 <sup>d</sup>             |

Values are mean ± S.D.. <sup>a</sup>*P* < 0.0001 vs. wildtype sham, <sup>b</sup>*P* < 0.0001 vs. wildtype TAC, <sup>c</sup>*P* < 0.001 vs. *Isg15*<sup>-/-</sup> sham, <sup>d</sup>*P* < 0.05 vs. wildtype sham by one-way ANOVA followed by Tukey's post hoc test.

**Supplemental Table 10. Heart rate and chamber dimensions determined by M-mode echocardiography in wildtype and *Isg15<sup>-/-</sup>* mice 8 weeks after sham or transverse aortic constriction (TAC).**

|                  | Wildtype sham | Wildtype TAC           | <i>Isg15<sup>-/-</sup></i> sham | <i>Isg15<sup>-/-</sup></i> TAC |
|------------------|---------------|------------------------|---------------------------------|--------------------------------|
| <i>n</i>         | 15            | 12                     | 13                              | 14                             |
| Heart rate (bpm) | 363±56        | 384±66                 | 399±38                          | 384±76                         |
| LVDs (mm)        | 3.1±0.6       | 3.6±0.7                | 3.2±0.6                         | 2.9±0.9 <sup>a</sup>           |
| LVDd (mm)        | 4.1±0.3       | 4.2±0.6                | 4.1±0.4                         | 4.1±0.6                        |
| LVESV (μl)       | 40±15         | 58±22                  | 43±5                            | 43±24                          |
| LVEDV (μl)       | 76±13         | 81±23                  | 75±19                           | 76±24                          |
| LVAWT (mm)       | 0.84±0.11     | 1.09±0.23 <sup>b</sup> | 0.87±0.13 <sup>a</sup>          | 1.12±0.18 <sup>cd</sup>        |
| LVPWT (mm)       | 0.76±0.11     | 1.00±0.05 <sup>c</sup> | 0.65±0.07 <sup>e</sup>          | 0.92±0.17 <sup>fg</sup>        |

bpm = beats per minute, LVDs = left ventricular internal diameter at systole, LVDd = left ventricular internal diameter at diastole, LVESV = left ventricular end systolic volume, LVEDV = left ventricular end diastolic volume, LVAWT = left ventricular anterior wall thickness, LVPWT = left ventricular posterior wall thickness. Values are mean ± S.D.. <sup>a</sup>*P* < 0.05 vs. wildtype TAC, <sup>b</sup>*P* < 0.01 vs. wildtype sham, <sup>c</sup>*P* < 0.001 vs. wildtype sham, <sup>d</sup>*P* < 0.01 vs. *Isg15<sup>-/-</sup>* sham, <sup>e</sup>*P* < 0.0001 vs. wildtype TAC, <sup>f</sup>*P* < 0.05 vs. wildtype sham, <sup>g</sup>*P* < 0.0001 vs. *Isg15<sup>-/-</sup>* sham by one-way ANOVA followed by Tukey's post hoc test.

**Supplemental Table 11. Invasive hemodynamic parameters in wildtype and *Isg15<sup>-/-</sup>* mice 8 weeks after sham or transverse aortic constriction (TAC).**

|                         | Wildtype sham | Wildtype TAC        | <i>Isg15<sup>-/-</sup></i> sham | <i>Isg15<sup>-/-</sup></i> TAC |
|-------------------------|---------------|---------------------|---------------------------------|--------------------------------|
| <i>n</i>                | 15            | 10                  | 13                              | 13                             |
| Ejection fraction (%)   | 59±19         | 39±23               | 57±17                           | 53±23                          |
| P <sub>max</sub> (mmHg) | 100±17        | 143±30 <sup>a</sup> | 101±12 <sup>b</sup>             | 162±18 <sup>ac</sup>           |
| ESP (mmHg)              | 96±17         | 136±25 <sup>a</sup> | 95±13 <sup>b</sup>              | 147±17 <sup>ac</sup>           |
| EDP (mmHg)              | 14±5          | 15±6                | 14±5                            | 18±7                           |
| dP/dt max<br>(mmHg/sec) | 6085±1751     | 6935±3363           | 6269±2206                       | 8063±1884                      |
| dP/dt min<br>(mmHg/sec) | -5205±1606    | -6624±2760          | -5963±2048                      | -7406±2120                     |
| Tau (ms)                | 13±4          | 13±8                | 11±2                            | 10±3                           |

P<sub>max</sub> = maximum pressure (peak systolic pressure), ESP = end systolic pressure, EDP = end diastolic pressure. Values are mean ± S.D.. <sup>a</sup>P < 0.0001 vs. wildtype sham, <sup>b</sup>P < 0.0001 vs. wildtype TAC, <sup>c</sup>P < 0.0001 vs. *Isg15<sup>-/-</sup>* sham by one-way ANOVA followed by Tukey's post hoc test.

**Supplemental Table 12. Significantly enriched KEGG pathways in the untargeted metabolomic comparison of *Isg15*<sup>-/-</sup> and wildtype mouse hearts 8 weeks after transverse aortic constriction (TAC).**

| Pathway                                     | Pathway total | Hits.total | Hits.significant | Expected | p_value  |
|---------------------------------------------|---------------|------------|------------------|----------|----------|
| D-Glutamine and D-glutamate metabolism      | 6             | 6          | 6                | 0.5343   | 0.000275 |
| β-Alanine                                   | 21            | 8          | 5                | 1.0686   | 0.001367 |
| Glutathione metabolism                      | 19            | 6          | 4                | 0.8014   | 0.003368 |
| Porphyrin and chlorophyll metabolism        | 27            | 5          | 4                | 0.5343   | 0.008044 |
| Arginine and proline metabolism             | 37            | 23         | 12               | 2.6715   | 0.009076 |
| Alanine, aspartate and glutamate metabolism | 28            | 12         | 6                | 1.6029   | 0.012798 |
| Arginine biosynthesis                       | 14            | 8          | 4                | 1.0686   | 0.012836 |
| Histidine metabolism                        | 16            | 7          | 4                | 1.0686   | 0.012836 |
| Aminoacyl-tRNA biosynthesis                 | 22            | 18         | 7                | 2.9386   | 0.016215 |
| Nitrogen metabolism                         | 6             | 2          | 2                | 0.26715  | 0.017423 |
| Lysine degradation                          | 19            | 8          | 4                | 1.2022   | 0.020886 |
| Pantothenate and CoA biosynthesis           | 17            | 8          | 4                | 1.4693   | 0.044731 |

**Supplemental Table 13. Antibodies used for flow cytometric identification of CCR2+ cardiac macrophages.**

| <b>Surface<br/>Marker</b> | <b>Fluorescence<br/>Tag</b> | <b>Clone</b> | <b>Catalogue No.</b> | <b>Source</b> |
|---------------------------|-----------------------------|--------------|----------------------|---------------|
| Ly6c                      | BV 605                      | HK 1.4       | 128035               | Biolegend     |
| CD45                      | PE/Cy7                      | 30-F11       | 103114               | Biolegend     |
| CD11b                     | PE                          | M1/70        | 101207               | Biolegend     |
| CD64                      | PE/Dazzle 594               | X54-5/7.1    | 139319               | Biolegend     |
| MHC-II                    | Alexa Fluor 700             | M5/114.15.2  | 56-5321-80           | eBioscience   |

**Supplemental Table 14. Primer sequences used in quantitative reverse transcription polymerase chain reaction (qRT-PCR) experiments.**

| <b>Species</b> | <b>Gene name</b> | <b>Forward primer sequence (5'-&gt;3')</b> | <b>Reverse primer sequence (5'-&gt;3')</b> |
|----------------|------------------|--------------------------------------------|--------------------------------------------|
| Mus musculus   | <i>Rpl13a</i>    | GCTCTCAAGGTTGTTCTGGCTGA                    | AGATCTGCTTCTTCTTCCGATA                     |
| Mus musculus   | <i>Irf7</i>      | CAGCGAGTGCTGTTTGGAGA                       | AAGTTCGTACACCTTATGCCG                      |
| Mus musculus   | <i>Isg15</i>     | TGGTACAGAACTGCAGCGAG                       | AGCCAGAACTGGTCTTCGTG                       |
| Mus musculus   | <i>Bst2</i>      | ACATGGCGCCCTCTTTCTATCACT                   | TGACGGCGAAGTAGATTGTCAGGA                   |
| Mus musculus   | <i>Ifit1</i>     | CTGAGATGTCACTTCACATGGAA                    | GTGCATCCCCAATGGGTTCT                       |
| Mus musculus   | <i>Ifit3</i>     | CCTACATAAAGCACCTAGATGGC                    | ATGTGATAGTAGATCCAGGCGT                     |
| Mus musculus   | <i>Gvin1</i>     | GAGAGACTGCAAGGAAGCCAAAG                    | GGTGCCAAAGTTGTCCTTGAAGG                    |
| Mus musculus   | <i>Oasl2</i>     | GATGGATATCCTCCCAGCTTACG                    | TTGGTGAGAAGTCACCAGGGTAG                    |
| Mus musculus   | <i>Lgals3bp</i>  | TGGAACCTTTTGGATGCCCA                       | GAAGCCCCGTGGTATCGTT                        |
| Mus musculus   | <i>Ifitm3</i>    | CCCCCAAACCTACGAAAGAATCA                    | ACCATCTTCCGATCCCTAGAC                      |
| Mus musculus   | <i>Ifi2712a</i>  | CTGTTTGGCTCTGCCATAGGAG                     | CCTAGGATGGCATTGTTGATGTGG                   |
| Homo sapiens   | <i>ISG15</i>     | GCGCAGATCACCCAGAAGAT                       | GTTTCGTCGCATTTGTCCACC                      |
| Homo sapiens   | <i>GATA4</i>     | ACCCAATCTCGTAGATATGTTT                     | AGGCGTTGCACAGATAGTGA                       |
| Homo sapiens   | <i>ACTC1</i>     | TGTGCCAAGATGTGTGACGA                       | AGGGTCAGGATGCCTCTCTT                       |
| Homo sapiens   | <i>RPL13A</i>    | TCGTACGCTGTGAAGGCATC                       | TTTTGTGGGGCAGCATACT                        |
| Homo sapiens   | <i>RPS18</i>     | TGATCCCTGAAAAGTTCCAGCA                     | CTTCGGCCCACACCCTTAAT                       |

## SUPPLEMENTAL FIGURE LEGENDS

**Supplemental Figure 1.** Multi-color flow cytometry gating strategy and enumeration of CCR2+ cardiac monocyte-derived macrophages (CD45<sup>+</sup>Ly6c<sup>hi</sup>CD11b<sup>+</sup>CD64<sup>+</sup>MHC-II<sup>hi</sup>GFP<sup>+</sup> cells).

**Supplemental Figure 2.** Flow diagram showing outcomes for wildtype and *Ccr2*<sup>-/-</sup> mice subjected to sham or transverse aortic constriction (TAC).

**Supplemental Figure 3.** Representative M-mode echocardiographs (A) and (B) fractional shortening, (C) cardiac output and (D) stroke volume in wildtype and *Ccr2*<sup>-/-</sup> mice 8 weeks after sham or TAC surgery. Wildtype sham (n=16), wildtype TAC (n=17), *Ccr2*<sup>-/-</sup> sham (n=14), *Ccr2*<sup>-/-</sup> TAC (n=17). Values are mean ± S.D.. \**P* < 0.05, \*\**P* < 0.01, \*\*\**P* < 0.001, \*\*\*\**P* < 0.0001 by one-way ANOVA followed by Tukey's post hoc test.

**Supplemental Figure 4.** (A) Heat map showing genes differentially expressed in adult mouse cardiomyocytes incubated in control media or media conditioned by CCR2+ cardiac macrophages for 24 hours, fold change ≥ 2.5 fold, *P* < 0.05. (B) Venn diagram of genes differentially regulated in adult mouse cardiomyocytes incubated for 24 hours in media conditioned by CCR2+ macrophages (CD45<sup>+</sup>Ly6c<sup>hi</sup>CD11b<sup>+</sup>CD64<sup>+</sup>MHC-II<sup>hi</sup>GFP<sup>+</sup> cells) isolated from mouse hearts 4 weeks after transverse aortic constriction (TAC). The gene symbols for the 42 genes observed to be (≥ 2.5 fold) differentially expressed by RNA sequencing (A) were entered into Interferome v.2.01 and the database was searched for previous entries where genes have been up- or down-regulated ≥ 2 fold (default settings). Note, 39/42 of the differentially expressed genes have previously been observed to be regulated by either type I or type II interferons. Because there are more datasets available for genes regulated by type I interferons than types II or III, caution should be used in interpreting low or negative results for type II or type III interferons.

**Supplemental Figure 5.** Quantitative reverse transcription polymerase chain reaction (qRT-PCR) for interferon response genes (*Isg15*, *Irf7*, *Ifit1*, *Ifit3*, *Ifi2712a*, *Ifitm3*, *Oasl2*, *Lgals3bp*, *Bst2*, *Gvin1*) in mouse hearts 1, 4 or 8 weeks after TAC in comparison to control hearts 8 weeks after sham surgery (n=5/group). Values are mean  $\pm$  S.D.. \**P* < 0.05, \*\**P* < 0.01 by one-way ANOVA followed by Dunnett's post hoc test.

**Supplemental Figure 6.** Flow cytometry determination of CCR2 expression in CD45+CD64+CD11b+ bone marrow-derived macrophages (BMDMs) from wildtype and *Ccr2*<sup>gfp/+</sup> mice, demonstrating that BMDMs are CCR2 positive.

**Supplemental Figure 7.** Flow cytometry histograms of CD4+ T cells isolated from mouse spleens (left unstained; right anti-CD4 stained), confirming >97% purity of the cell population for CD4+ cells.

**Supplemental Figure 8.** Immunoblotting mouse hearts 1, 4 or 8 weeks after TAC, in comparison to control hearts 8 weeks after sham surgery for (A) cGAS, (B) STING, (C) RIG-I and (D) MAVS (n=5/group). Values are mean  $\pm$  S.D.. \**P* < 0.05, \*\**P* < 0.01 by one-way ANOVA followed by Dunnett's post hoc test.

**Supplemental Figure 9.** (D) Immunoblotting for ISG15 in mouse cardiomyocytes following stimulation with 500IU/mL IFN- $\alpha$  or 500ng/mL poly(I:C) LMW/LyoVec for 48 hours (n=5/condition). Values are mean  $\pm$  S.D.. \*\*\*\**P* < 0.0001 by one-way ANOVA followed by Dunnett's post hoc test.

**Supplemental Figure 10.** Phase contrast image showing human cardiac myocytes after culture for 21 days, with their elongated appearance, beginning to form myotube-like structures. Scale bar = 200 $\mu$ m.



**Supplemental Figure 11.** Echocardiographic parameters of wildtype mice 4 weeks after sham (n=16) or transverse aortic constriction (TAC; n=17). (A) Left ventricular mass. (B) Ejection fraction. (C) Fractional shortening. (D) Cardiac output. (E) Stroke volume. \*\* $P < 0.01$ , \*\*\*\* $P < 0.0001$  by unpaired two-tailed Student  $t$  test.

**Supplemental Figure 12.** Dual immunofluorescence staining for ISG15 and filamin-C in the hearts of sham-operated *Isg15<sup>-/-</sup>* mice and *Isg15<sup>-/-</sup>* mice 1 week after TAC. Scale bar = 10 $\mu$ m.

**Supplemental Figure 13.** Flow diagram showing outcomes for wildtype and *Isg15<sup>-/-</sup>* mice subjected to sham or transverse aortic constriction (TAC).

**Supplemental Figure 14.** Cardiomyocyte size, interstitial fibrosis and mitochondrial density in wildtype and *Isg15<sup>-/-</sup>* mice 8 weeks after sham or transverse aortic constriction (TAC). (A) H&E stained cardiac cross sections and myocyte cross sectional area. Scale bar = 50 $\mu$ m. (B) Picrosirius red staining and quantitation of cardiac picrosirius red positive area. Scale bar = 100 $\mu$ m. Wildtype sham (n=15), wildtype TAC (n=12), *Isg15<sup>-/-</sup>* sham (n=13), *Isg15<sup>-/-</sup>* TAC (n=14) for each, except (B) wildtype sham (n=14). (C) Representative transmission electron micrographs of cardiomyocytes from wildtype and *Isg15<sup>-/-</sup>* mice 8 weeks after sham or TAC surgery and quantitation of mitochondria number per x8000 field in approximately 15 fields per mouse. Scale bar = 1 $\mu$ m. Wildtype sham (n=4), wildtype TAC (n=5), *Isg15<sup>-/-</sup>* sham (n=6), *Isg15<sup>-/-</sup>* TAC (n=7). Values are mean  $\pm$  S.D. \* $P < 0.05$ , \*\* $P < 0.01$ , \*\*\* $P < 0.001$ , \*\*\*\* $P < 0.0001$  by one-way ANOVA followed by Tukey's post hoc test (skew distributed data in B were log-transformed prior to statistical comparison).

**Supplemental Figure 15.** RNAscope in situ hybridization for *Ccr2* and immunofluorescence staining for Troponin I in heart sections of *Isg15<sup>-/-</sup>* mice 8 weeks after sham surgery and *Isg15<sup>-/-</sup>* mice 1, 4 and 8 weeks after transverse aortic constriction (TAC). Scale bar = 10 $\mu$ m. Quantitation of *Ccr2* expressing cells per cardiac section. *Isg15<sup>-/-</sup>* sham (n=6), *Isg15<sup>-/-</sup>* 1 week TAC (n=5), *Isg15<sup>-/-</sup>* 4 weeks TAC (n=4),

*Isg15<sup>-/-</sup>* 8 weeks TAC (n=5)). Values are mean  $\pm$  S.D.. \*\*\*\* $P < 0.0001$  by one-way ANOVA followed by Dunnett's post hoc test.

**Supplemental Figure 16.** Principal component analysis (PCA) plots following untargeted metabolomics in hearts of wildtype (WT) and *Isg15<sup>-/-</sup>* (KO) mice 8 weeks after sham or TAC surgery. Wildtype sham (n=3), wildtype TAC (n=4), *Isg15<sup>-/-</sup>* sham (n=4), *Isg15<sup>-/-</sup>* TAC (n=4).

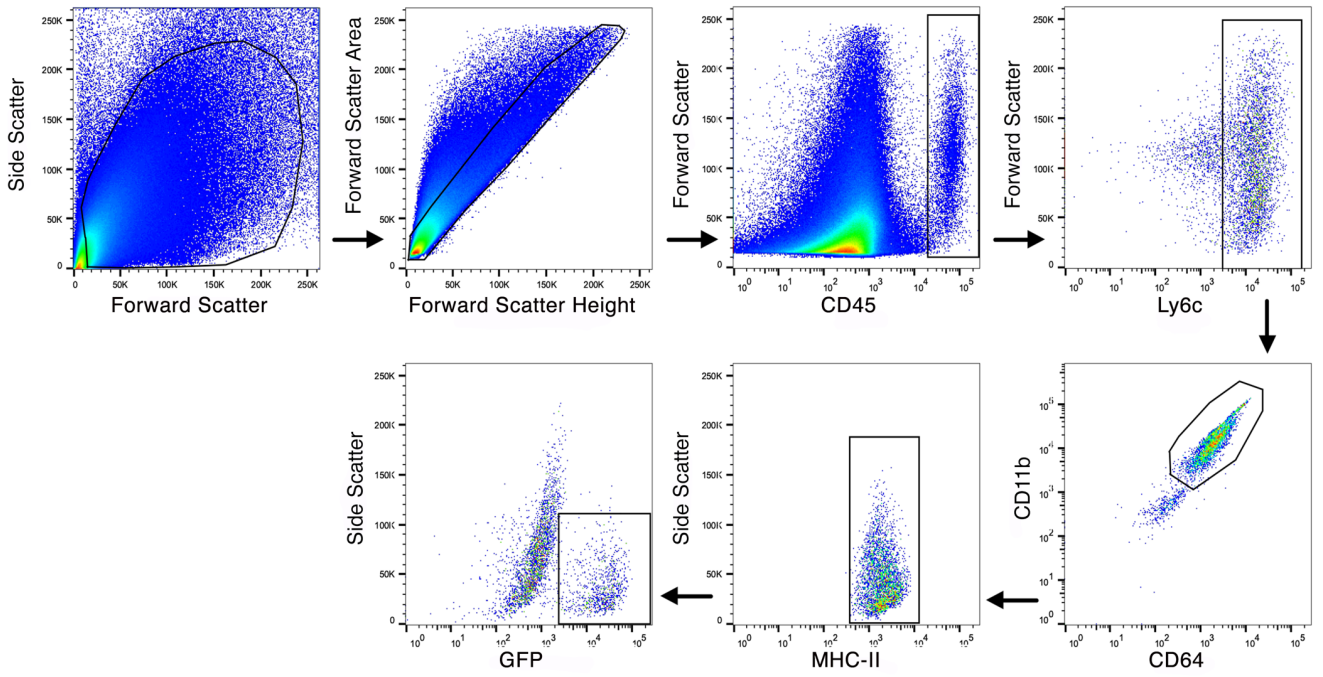

**Supplemental Figure 1.**

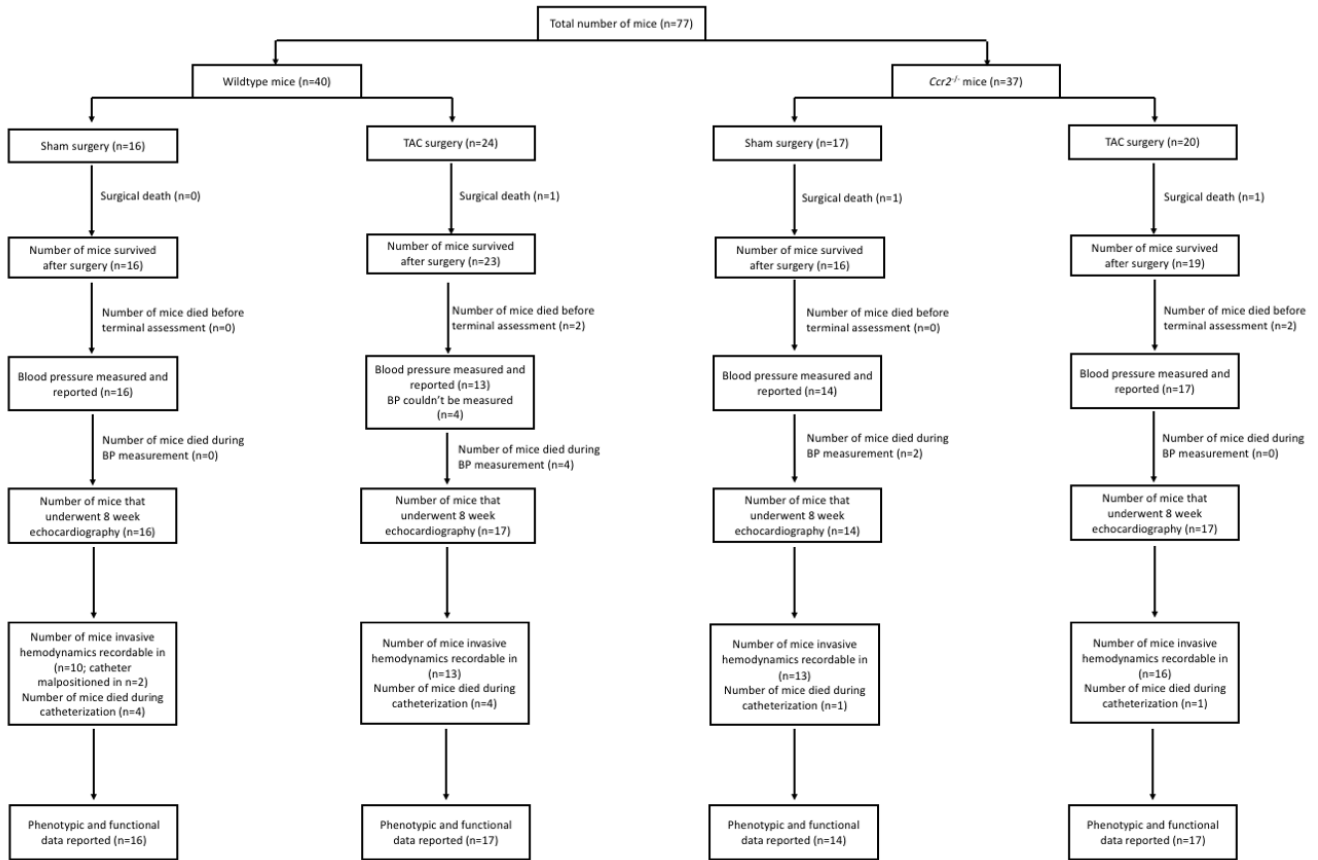

**Supplemental Figure 2.**

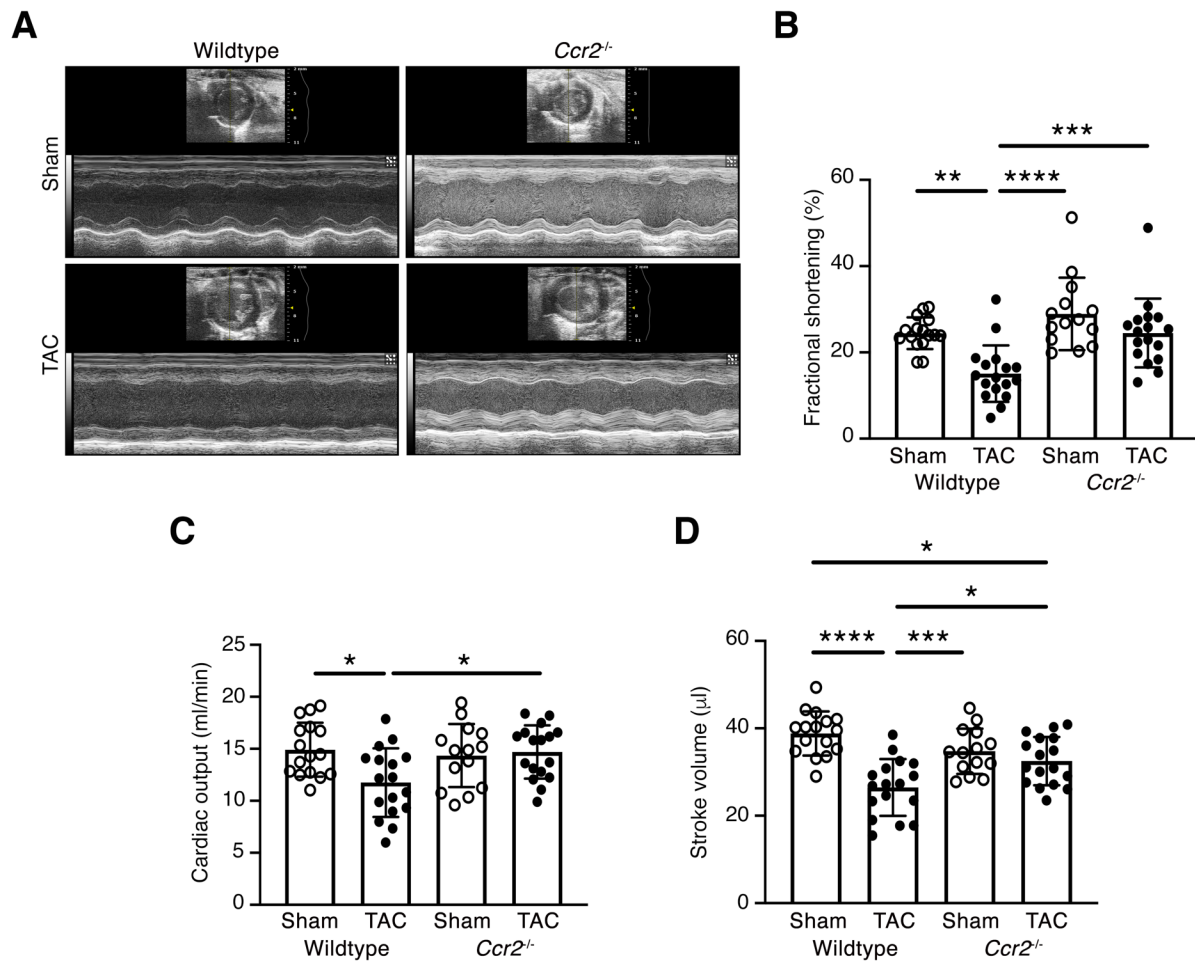

Supplemental Figure 3.

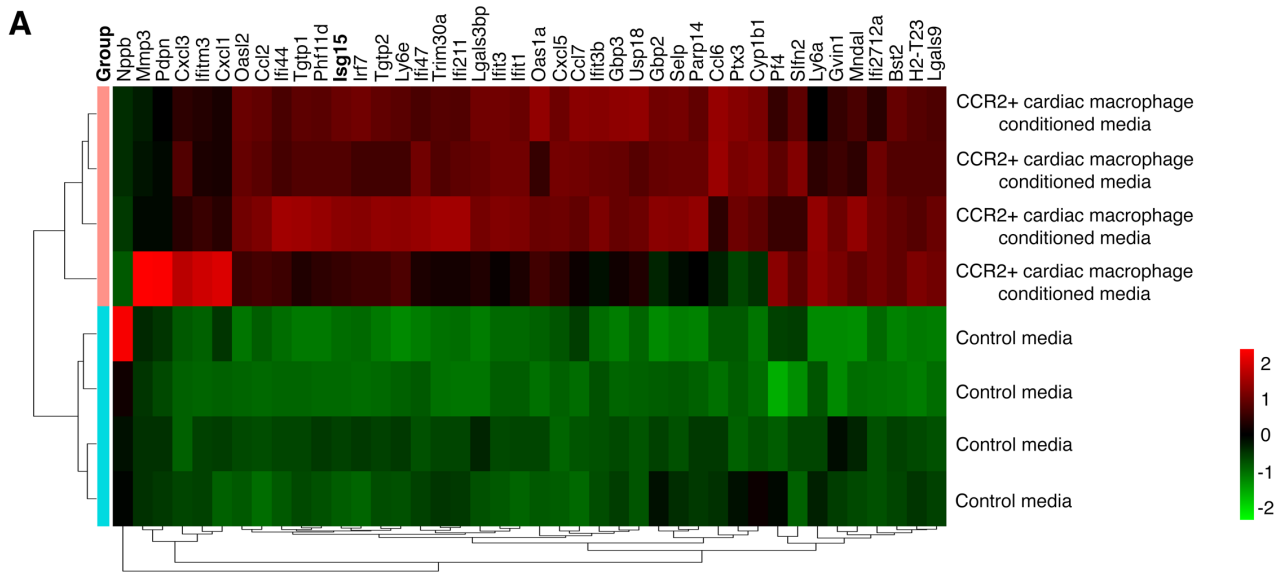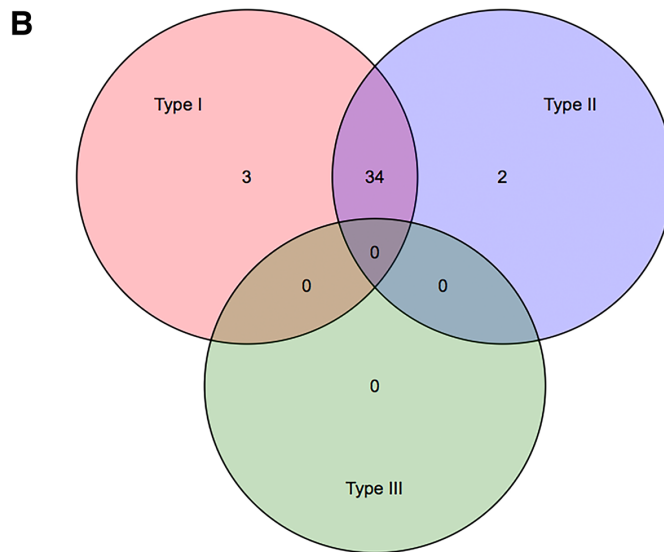

Supplemental Figure 4.

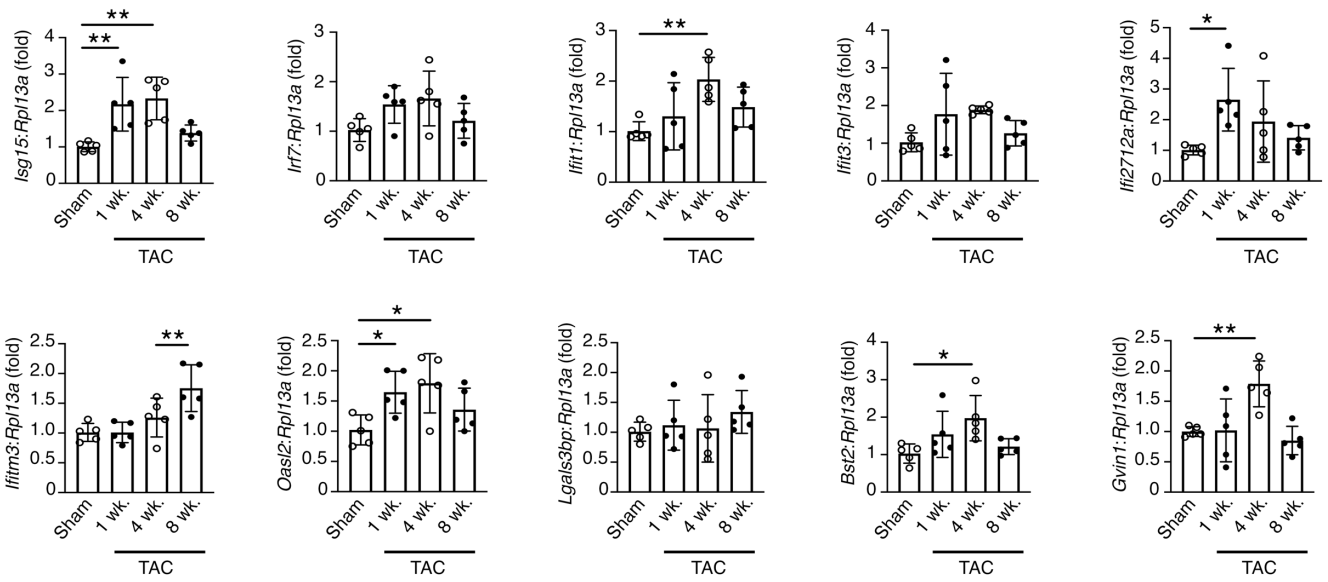

**Supplemental Figure 5.**

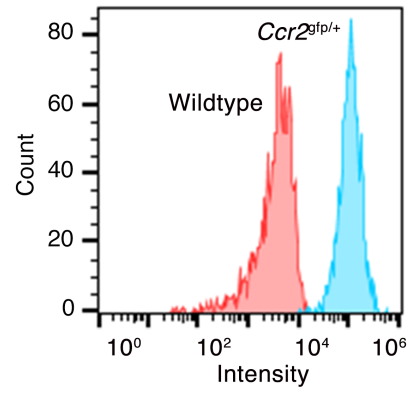

**Supplemental Figure 6.**



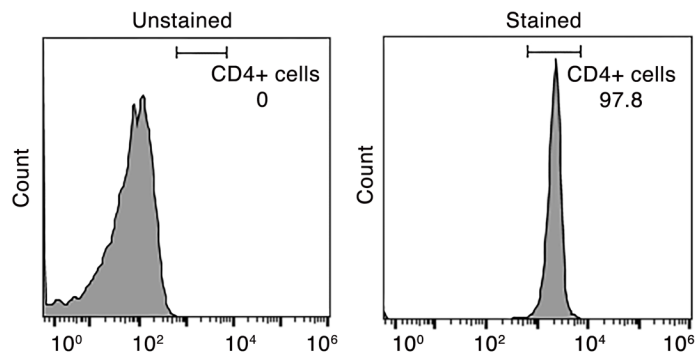

**Supplemental Figure 7.**

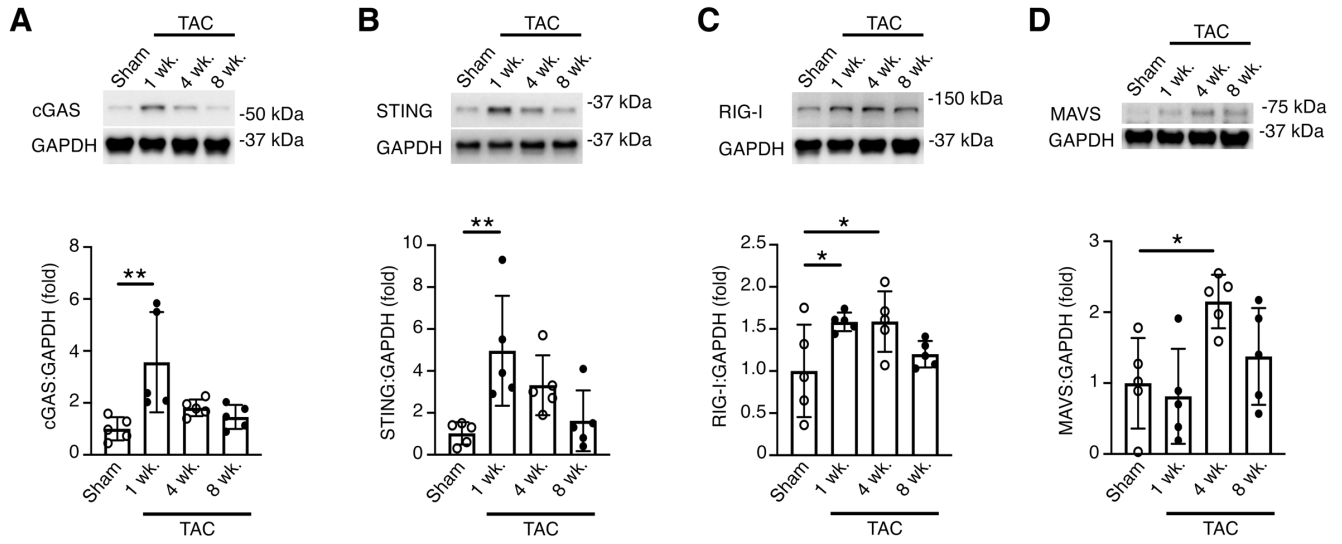

**Supplemental Figure 8.**

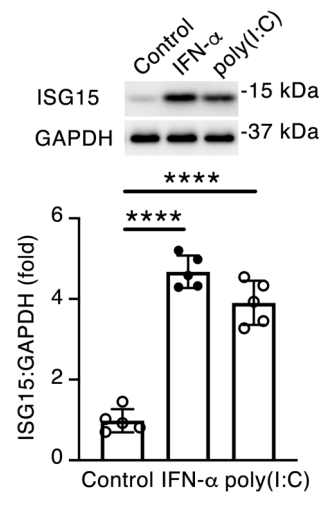

**Supplemental Figure 9.**

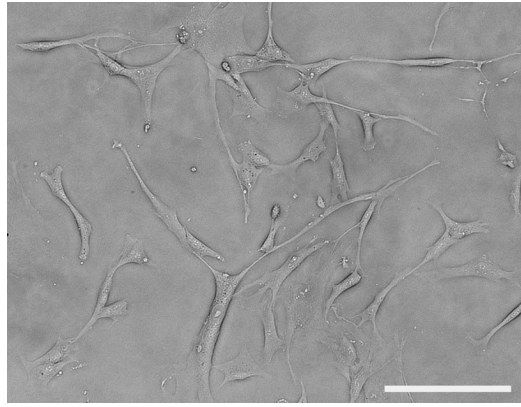

**Supplemental Figure 10.**

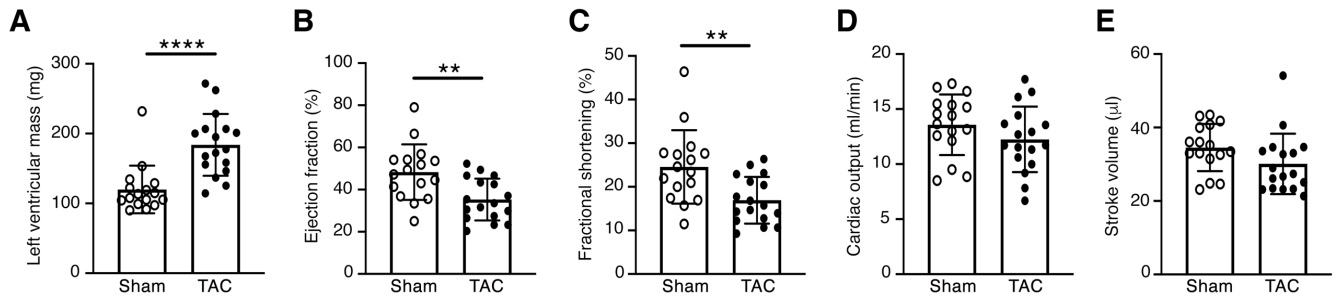

**Supplemental Figure 11.**

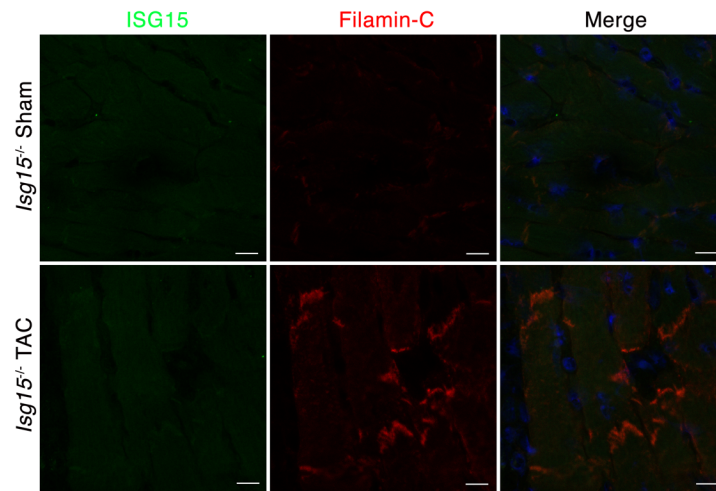

Supplemental Figure 12.

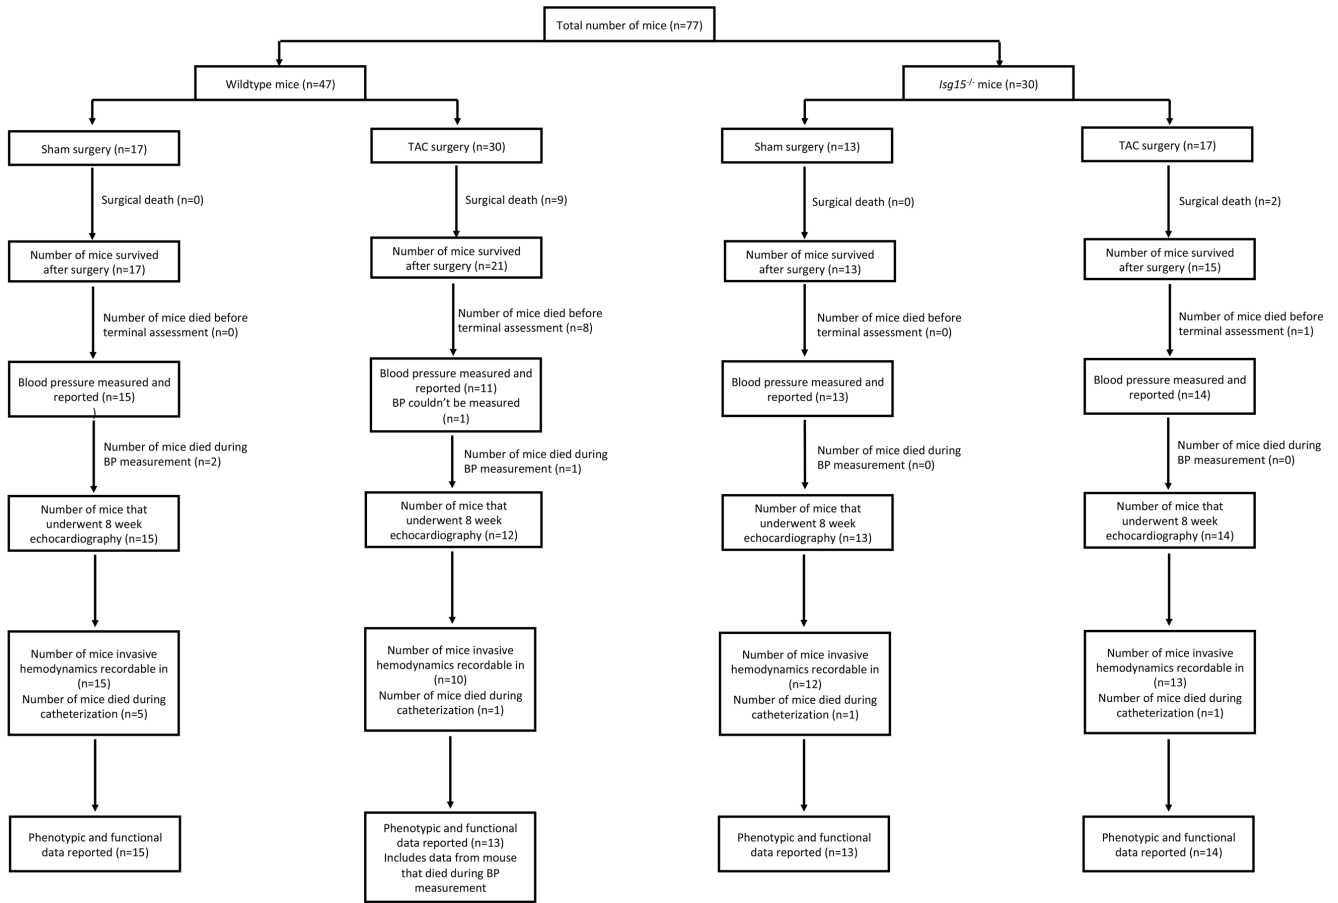

**Supplemental Figure 13.**

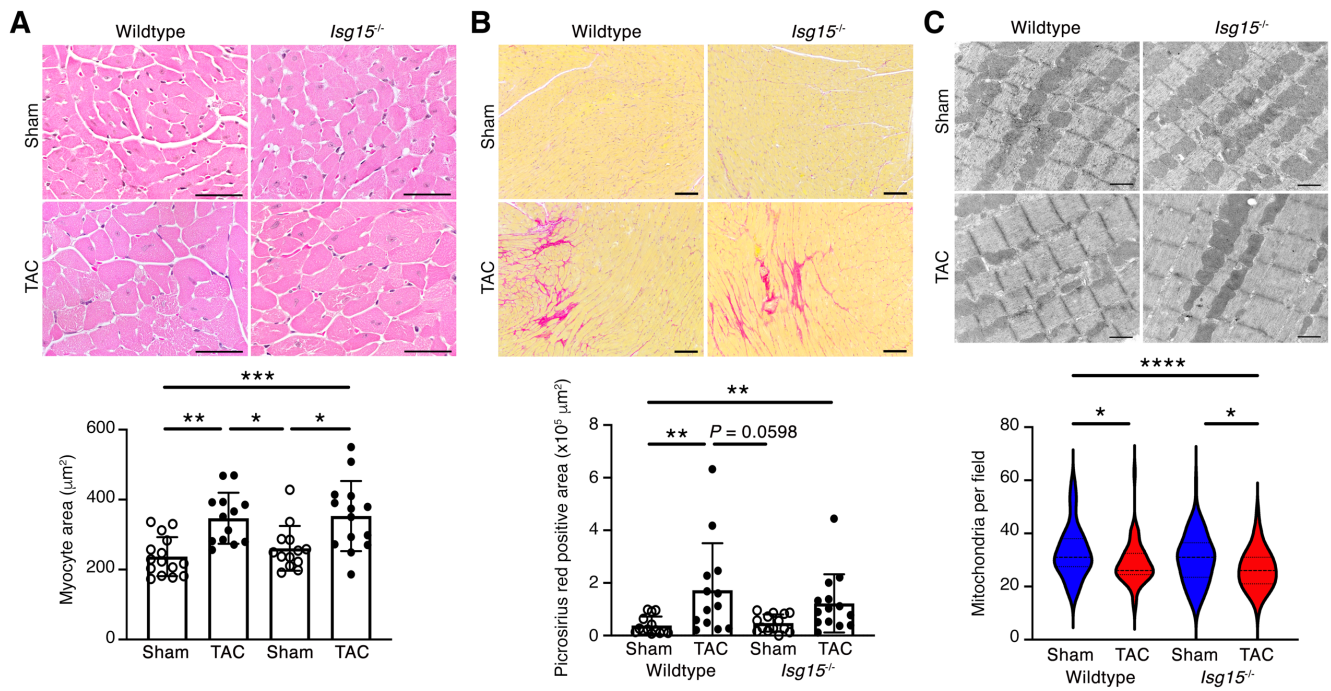

**Supplemental Figure 14.**



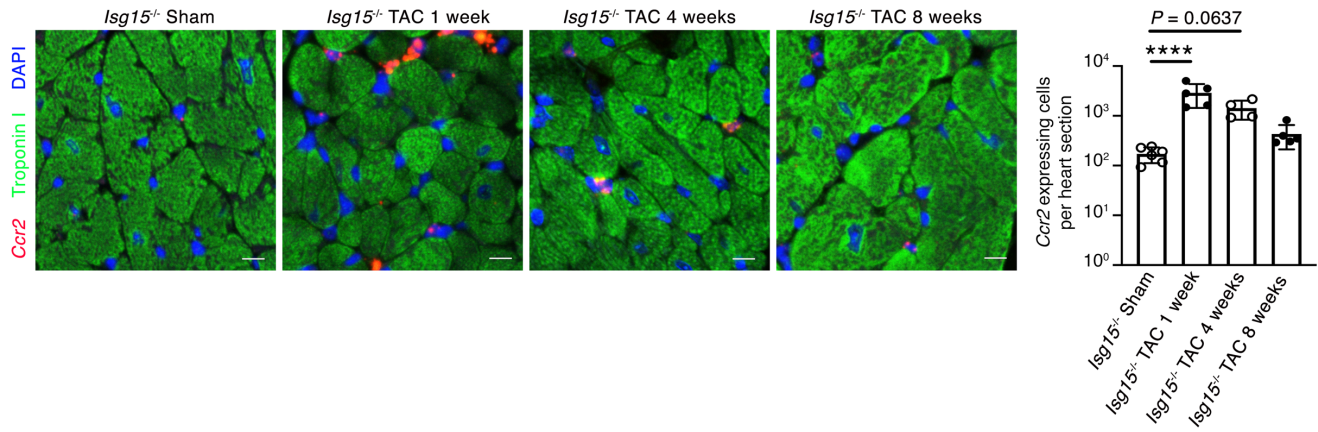

Supplemental Figure 15.

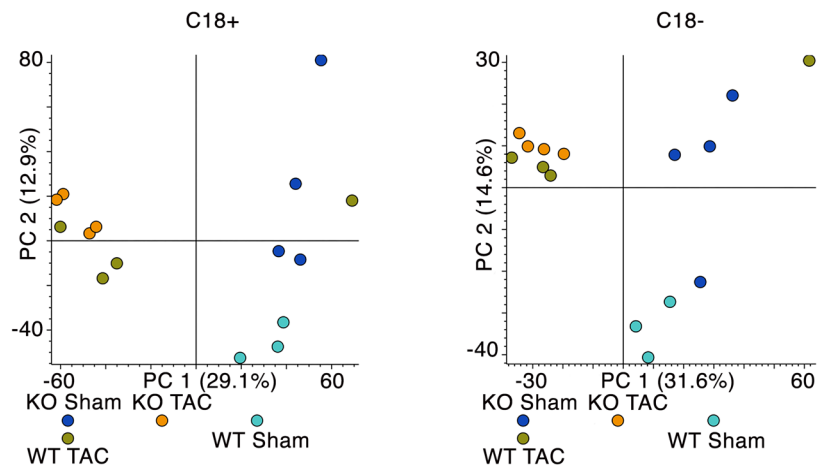

Supplemental Figure 16.
